# Supplementary material for: Development of a bimetal–organic framework–polypyrrole composite as a novel fiber coating for direct immersion solid phase microextractionin situsupercritical fluid extraction coupled with gas chromatography for simultaneous determination of furfurals in dates
Source: Royal Society of Chemistry journal article supplement (doi:10.1039/d1ay01211h), 2021-01-01
Supplement: d1ay01211h1.pdf [file d1ay01211h1.pdf]

ARTICLE

# Development of bimetal-organic frameworks-polypyrrole composite as a novel fiber coating for direct immersion solid phase microextraction in-situ supercritical fluid extraction coupled to gas chromatography for simultaneous determination of furfurals in dates

Received 00th January 20xx,  
Accepted 00th January 20xx

DOI: 10.1039/x0xx00000x

Farhad Raofie,\*<sup>a</sup> Zohreh Falsafi <sup>a</sup>

## Supplementary material

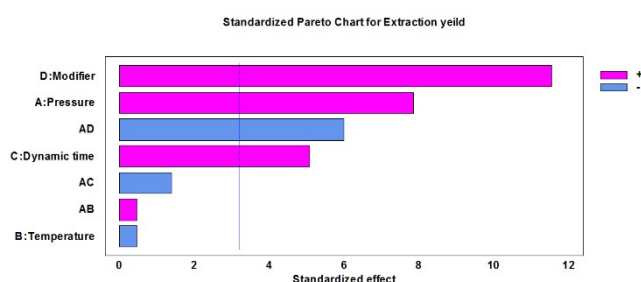

Figure S1. Pareto chart of the main effects obtained from the 2n-1 fractional factorial design for 2-F and 5-HMF

## Apparatus

A Suprex (USA) MPS/225 system in SFE mode was utilized for all extractions. Extractions were accomplished using a 3 mL volume stainless steel extraction vessel. A Duraflow manual variable restrictor (Suprex; USA) was applied in the SFE system for collecting the extracted analytes. In order to prevent sample plugging, the restrictor point was warmed electrically.

An Agilent GC system equipped with a split/splitless injector and flame ionization detection system. (GC-FID) (7890A, Palo

Alto, USA) was used for this experiment. GC separation was performed using a HP-11NOWAX capillary column (15 m × 0.25 mm × 0.50 μm). The initial temperature of column was 100 °C and held for 5 min, increased to 240 °C at a rate of 15 °C min<sup>-1</sup>. The injection mode was splitless for 5 min and temperature was set at 250 °C. The detector was set at 275 °C. Helium (99.999%) was used as the carrier gas at a flow rate of 1.2 mL min<sup>-1</sup>. The SEM images were obtained by a Mira3 TESCAN (Kohoutovice, Czech Republic). X-ray diffraction (XRD) patterns were obtained by a Philips PW 1729 diffractometer with Cu-K(α) radiation.

## Central composite design condition

Table S1 shows the main factors and the levels examined for CCD. The experimental runs were fitted to the following second order polynomial model:

$$Y = \beta_0 + \beta_1 X_1 + \beta_2 X_2 + \beta_3 X_3 + \beta_{11} X_1^2 + \beta_{12} X_1 X_2 + \beta_{13} X_1 X_3 + \beta_{22} X_2^2 + \beta_{23} X_2 X_3 + \beta_{33} X_3^2$$

where  $X_1$ ,  $X_2$ , and  $X_3$  are the independent variables,  $\beta_0$  is the intercept,  $\beta_1$ ,  $\beta_2$ ,  $\beta_3$ ,  $\beta_{12}$ ,  $\beta_{13}$ ,  $\beta_{23}$ ,  $\beta_{11}$ ,  $\beta_{22}$  and  $\beta_{33}$  are the regression coefficients and  $Y$  is the response function (ER). Model terms were selected or rejected based on the p-value at a 95% confidence level.

<sup>a</sup> Department of Analytical Chemistry and pollutants, Shahid Beheshti University, Tehran, 1983963113, Iran.

<sup>a</sup> Corresponding author, email: f\_raofie@sbu.ac.ir Fax: +98-21-22431661.

## ARTICLE

Table S1: Experimental variables, levels and star points of the central composite design (CCD).

| Variable                          | Key | Level |         |       | Star points ( $\alpha = 1.682$ ) |           |
|-----------------------------------|-----|-------|---------|-------|----------------------------------|-----------|
|                                   |     | Lower | Central | Upper | $-\alpha$                        | $+\alpha$ |
| Pressure (atm)                    | A   | 300   | 325     | 350   | 282.95                           | 367.04    |
| Dynamic extraction time (min)     | B   | 10    | 15      | 20    | 6.59                             | 23.40     |
| Modifier volume ( $\mu\text{L}$ ) | C   | 100   | 150     | 200   | 65.91                            | 234.09    |

The required number of experimental runs can be calculated as  $(2^f + 2f + C)$ , where  $f$  is the number of independent variables and  $C$  is the number of repetitions of the experiments at the center point. This CCD ( $\alpha = 1.682$ ) was carried out in 19 randomized runs ( $2^3 + (2 \times 3) + 5$ ) consisting of a ( $2^3$ ) factorial design augmented with ( $2 \times 3$ ) star points and 5 central points. The significant factors, their levels and results are provided in Table S2.

Table S2: The central composite design (CCD) program and results for SFE-DI- SPME-GC-FID of 2-F and 5-HMF

| Run no. | Pressure (atm) | Dynamic time (min) | Modifier volume ( $\mu\text{L}$ ) | ER%  |
|---------|----------------|--------------------|-----------------------------------|------|
| 1       | 350            | 10                 | 100                               | 30.3 |
| 2       | 325            | 15                 | 150                               | 89.5 |
| 3       | 325            | 15                 | 234.09                            | 63.9 |
| 4       | 325            | 23.409             | 150                               | 80   |
| 5       | 282.955        | 15                 | 150                               | 6.1  |
| 6       | 367.045        | 15                 | 150                               | 25.2 |
| 7       | 325            | 15                 | 65.9104                           | 17.1 |
| 8       | 300            | 10                 | 200                               | 56   |
| 9       | 325            | 6.59104            | 150                               | 62   |
| 10      | 325            | 15                 | 150                               | 89.5 |
| 11      | 325            | 15                 | 150                               | 89.5 |
| 12      | 300            | 20                 | 200                               | 57.2 |
| 13      | 350            | 20                 | 100                               | 51.3 |
| 14      | 350            | 20                 | 200                               | 87.8 |
| 15      | 325            | 15                 | 150                               | 89.5 |

|    |     |    |     |      |
|----|-----|----|-----|------|
| 16 | 325 | 15 | 150 | 89.5 |
| 17 | 350 | 10 | 200 | 40.6 |
| 18 | 300 | 10 | 100 | 14   |
| 19 | 300 | 20 | 100 | 9.8  |

The normal probability graph and the histogram of residuals indicated that the residuals were normally distributed and that this model successfully described the system under study.

ANOVA was applied to evaluate the data and the Pareto chart in Fig. S2. The ANOVA results demonstrated goodness of fit ( $R^2 = 0.98$ ) and goodness of prediction (adjusted  $R^2 = 0.97$ ). Comparison of models using adjusted  $R^2$  is a standard method for determining their fit with multiple linear regression. The adjusted  $R^2$  value of 0.97 implies that 97% of the variation associated with the furfural extraction yield can be attributed to the independent variables of pressure, modifier volume and dynamic extraction time.

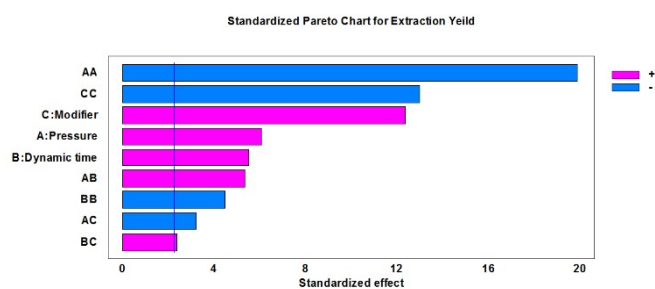

Fig. S2: Pareto chart of the main effects in the central composite design for 2-F and 5-HMF. AA, BB, and CC are the quadratic effects of the pressure, dynamic extraction time and modifier volume, respectively. AB, AC, and BC are the interaction effects between pressure and dynamic extraction time, pressure and modifier volume, and dynamic extraction time and modifier volume, respectively

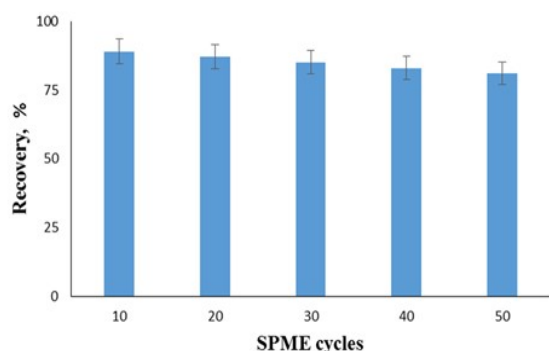

Fig. S3: Reusability of SPME fiber

Fig. S4: The SEM image of fiber after 50th use

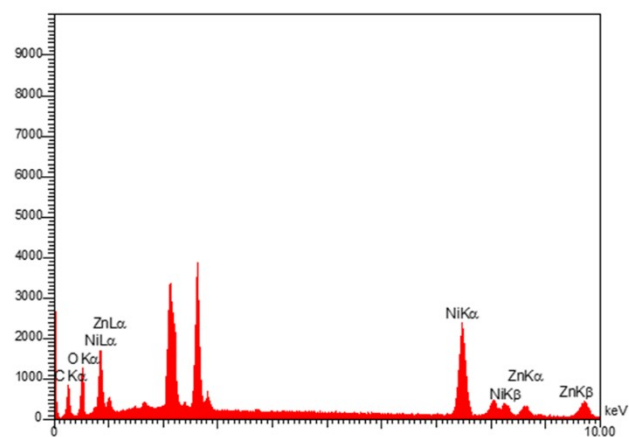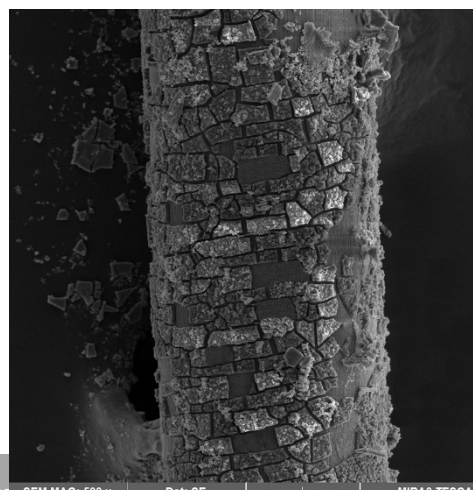

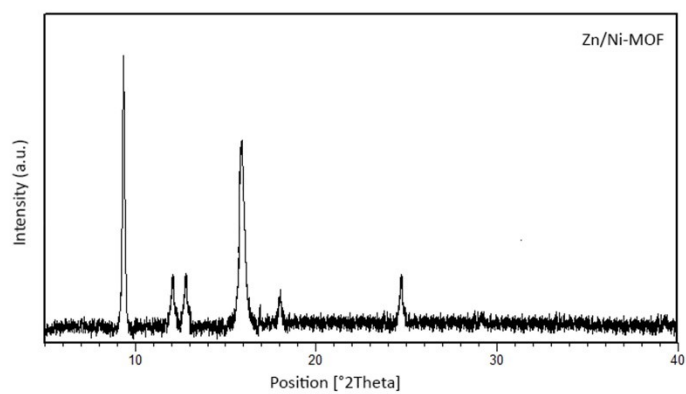

Fig. S6: XRD pattern of the MOF-coated fiber
